# Supplementary material for: Saharan dust episodes and pregnancy
Source: Royal Society of Chemistry journal article supplement (doi:10.1039/c1em10579e), 2011-01-01
Supplement: c1em10579e.pdf [file c1em10579e.pdf]

**Supplementary Table 1.** Minimum, maximum, and median of the number of episodic days during each trimester and whole pregnancy, Barcelona, 2003-2005.

|                 | Minimum | Maximum | Median |
|-----------------|---------|---------|--------|
| Trimester 1     | 0       | 12      | 4      |
| Trimester 2     | 0       | 12      | 3      |
| Trimester 3     | 0       | 15      | 4      |
| Whole pregnancy | 4       | 22      | 13     |
